# Supplementary material for: Compatibility and Possibility of New Ornamental Geophytes for Their Utilization in Landscape Architecture
Source: MDPI journal article supplement (doi:10.3390/horticulturae10010003), 2023-12-19
Supplement: s1 [file s1]

## Supplementary materials

**Table S1.** Scientific name, family, flower color, ornamentally-important organ, irrigation requirement, propagation method of studied geophytes.

| Scientific name                                              | Species/Variety                                        | Family                  | Flower color                      | ornamentally-important organ | Water requirement | Propagation method                    |
|--------------------------------------------------------------|--------------------------------------------------------|-------------------------|-----------------------------------|------------------------------|-------------------|---------------------------------------|
| <i>Polianthes tuberosa</i> L.                                | Pearl Majesty<br>Mahallati<br>Cinderella<br>Super Gold | <i>Amaryllidaceae</i>   | White                             | flower                       | High              | Daugherty bulb division               |
| <i>Crocasmia aurea</i> L.                                    | Aurora                                                 | <i>Iridaceae</i>        | Orange                            | Flower                       | moderate          | Daugherty bulb division               |
| <i>Hedychium coronarium</i> J.Koenig                         | White Butterfly                                        | <i>Zingiberaceae</i>    | White                             | Flower, leaf                 | High              | Rhizome division                      |
| <i>Alstroemeria aurea</i> Graham                             | Balance                                                | <i>Alstroemeriaceae</i> | Pink                              | flower                       | High              | Micropropagation/<br>rhizome division |
| <i>Freesia refracta</i> (Jacq.) Klatt                        | Ambassador<br>Bastogne<br>Red beauty<br>Pink Passion   | <i>Iridaceae</i>        | White,<br>Pink,<br>Yellow,<br>Red | flower                       | moderate          | Seed/ Daugherty bulb division         |
| <i>Narcissus tazetta</i> L.<br><i>Narcissus jonquilla</i> L. | Tazetta<br>Paperwhite<br>Live green<br>Jonquils        | <i>Amaryllidaceae</i>   | White,<br>Yellow                  | flower                       | moderate to low   | Daugherty bulb division               |
| <i>Hyacinthus orientalis</i> L.                              | Blue Jacket<br>Fondant<br>Blue Roman<br>Aiolos         | <i>Amaryllidaceae</i>   | Blue,<br>White,<br>Pink           | flower                       | moderate          | clove division                        |
| <i>Tulipa gesneriana</i> L.                                  | Buster<br>Strong Gold<br>Irani                         | <i>Liliaceae</i>        | Red,<br>Yellow                    | flower                       | moderate          | Daugherty bulb division               |
| <i>Iris × hollandica</i> H.R. Wehrh.                         | Blue Magic                                             | <i>Iridaceae</i>        | Purple                            | flower                       | moderate          | Daugherty bulb division               |
| <i>Dahlia pinnata</i> Cav.                                   | Red Runner<br>Aragon<br>Mystic<br>Illusion             | <i>Asteraceae</i>       | Red,<br>Yellow,<br>Pink           | flower                       | high              | tuberous root division                |
| <i>Gladiolus hybrida</i>                                     | Alexander<br>Rose Supreme                              | <i>Iridaceae</i>        | White,<br>Pink                    | flower                       | high              | Daugherty bulb division               |
| <i>Canna indica</i> L.                                       | Phasion<br>Flaccida<br>Striped Beauty                  | <i>Cannaceae</i>        | Red,<br>Yellow,<br>Orange         | Flower, leaf                 | high              | rhizome division                      |

**Table S2.** Distance between plants, number of geophytes per square meter, planting depth and time of underground organs in studied geophytes.

|                                              | Species/Variety                                        | Distance between plants (cm) | No. of geophytes/m <sup>2</sup> | Planting depth (cm) | Planting time (First year) | Planting time (Second year) |
|----------------------------------------------|--------------------------------------------------------|------------------------------|---------------------------------|---------------------|----------------------------|-----------------------------|
| <i>Polianthes tuberosa</i>                   | Pearl Majesty<br>Mahallati<br>Cinderella<br>Super Gold | 15-20                        | 24                              | 5-8                 | May 16                     | March 10 -15                |
| <i>Crocasmia aurea</i>                       | Aurora                                                 | 15-20                        | 12                              | 8-10                | May 16                     | Oct 12 – Nov 6              |
| <i>Hedychium coronarium</i>                  | White Butterfly                                        | 20-25                        | 12                              | 5-7                 | May 16                     | March 5-10                  |
| <i>Alstroemeria aurea</i> cv. <i>Balance</i> | Balance                                                | 15-20                        | 24                              | 8-10                | May 16                     | Apr 9 – May 5               |
| <i>Freesia refracta</i>                      | Ambassador<br>Bastogne<br>Red beauty<br>Pink Passion   | 10-15                        | 24                              | 7-10                | October 7                  | Oct 2- 7                    |
| <i>Narcissus tazetta</i>                     | <i>Tazetta</i><br>Paperwhite<br>Live green<br>Jonquils | 15-20                        | 24                              | 10-15               | September 24               | Sep 16-21                   |
| <i>Narcissus jonquilla</i>                   | -                                                      | 10-15                        | 32                              | 10-12               | January 2<br>October 12    | Dec 26 – Jan 5              |
| <i>Hyacinthus orientalis</i>                 | Blue Jacket<br>Fondant<br>Blue Roman<br>Aiolos         | 10-15                        | 32                              | 12-15               | January 2                  | Oct 7 -13                   |
| <i>Tulipa gesneriana</i>                     | Buster<br>Strong Gold                                  | 15-20                        | 24                              | 8-10                | October 7                  | Dec 26 – Jan 5              |
| <i>Iris</i> × <i>hollandica</i>              | Blue Magic                                             | 20-25                        | 20                              | 10-15               | May 16                     | Oct 7 -13                   |
| <i>Dahlia pinnata</i>                        | Red Runner<br>Aragon<br>Mystic Illusion                | 10-15                        | 24                              | 10-15               | May 16                     | March 10 -25                |
| <i>Gladiolus hybrida</i>                     | Alexander<br>Rose Supreme                              | 20-25                        | 12                              | 5-7                 | May 16                     | March 5-10                  |
| <i>Canna indica</i>                          | Phasion<br>Flaccida<br>Striped Beauty                  | 20                           | 20                              | 6-8                 | May 16                     | March 10 -15                |

**Table S3.** Flowering time (month) of studied geophytes.

[illegible]

|                                                        |   |   |   |   |  |   |   |   |   |   |   |   |
|--------------------------------------------------------|---|---|---|---|--|---|---|---|---|---|---|---|
| <i>Hedychium coronarium</i>                            |   |   |   |   |  |   |   |   | * | * | * |   |
| <i>Alstroemeria aurea</i> cv. <i>Balance</i>           |   |   |   |   |  |   |   |   | * | * | * | * |
| <i>Freesia refracta</i>                                |   |   |   |   |  | * | * |   |   |   |   |   |
| <i>Narcissus tazetta</i><br><i>Narcissus jonquilla</i> |   |   | * | * |  | * | * |   |   |   |   |   |
| <i>Hyacinthus orientalis</i>                           |   |   |   |   |  | * | * |   |   |   |   |   |
| <i>Tulipa gesneriana</i>                               |   |   |   |   |  | * | * |   |   |   |   |   |
| <i>Iris</i> × <i>hollandica</i>                        |   |   |   |   |  |   | * | * |   |   |   |   |
| <i>Dahlia pinnata</i>                                  | * |   |   |   |  |   |   |   |   |   | * | * |
| <i>Gladiolus hybrida</i>                               |   |   |   |   |  |   |   |   | * | * | * |   |
| <i>Canna indica</i>                                    | * | * | * |   |  |   |   |   | * | * | * | * |

**Table S4.** Soil analysis conducted used in the experiment.

| Total neutralizing value | Texture    | Clay (%) | Silt (%) | Sand (%) | Saturation percentage | Ec (mmohs/cm) | pH  | Organic carbon | N (%) | P (ppm) | K (ppm) |
|--------------------------|------------|----------|----------|----------|-----------------------|---------------|-----|----------------|-------|---------|---------|
| 20.2                     | Sandy loam | 12       | 33       | 55       | 38                    | 3.73          | 7.8 | 1.8            | 0.16  | 14.7    | 407     |
